# $\alpha_2$ -Adrenoceptor Activation by Clonidine Enhances Stimulation-evoked Acetylcholine Release from Spinal Cord Tissue after Nerve Ligation in Rats

Hideaki Obata, M.D.,\* Xinhui Li, Ph.D.,† James C. Eisenach, M.D.‡

**Background:** Spinally administered clonidine produces analgesia via  $\alpha_2$ -adrenergic receptors. The analgesic potency of clonidine and its dependency on muscarinic acetylcholine receptors increase in rats after nerve injury. The authors hypothesized that these changes reflect greater acetylcholine release from the spinal cord by clonidine, either through direct or indirect effects.

**Methods:** Male Sprague-Dawley rats were divided into two groups: no surgery or left L5 and L6 spinal nerve ligation (SNL). All experiments were performed 3 weeks after SNL. Crude synaptosomes were prepared from the spinal enlargement and loaded with [ $^3$ H]choline. Samples were incubated with clonidine in the absence or presence of KCl depolarization. The authors also examined the effect of clonidine on KCl evoked acetylcholine release using perfusion of spinal cord slices, in which some spinal circuitry is maintained.

**Results:** In synaptosomes, clonidine alone induced minimal acetylcholine release, which was actually greater in tissue from normal rats than in tissue from SNL rats. In the presence of KCl depolarization, however, clonidine enhanced acetylcholine release in tissue from SNL rats but inhibited release in tissue from normal rats. Similarly, in spinal cord slices, clonidine enhanced KCl evoked acetylcholine release in tissue from SNL animals but inhibited such release in tissue from normal animals. The  $\alpha_2$ -adrenoceptor antagonist idazoxan inhibited the effects of clonidine in slices from SNL rats.

**Conclusion:** These results suggest that clonidine enhances depolarization-induced acetylcholine release in neuropathic but not in normal spinal cord tissue. Interestingly, this enhanced acetylcholine release by clonidine occurs in a synaptosomal preparation, consistent with a direct effect on  $\alpha_2$  adrenoceptors on cholinergic terminals. Enhanced release of acetylcholine by clonidine could contribute to increased analgesia of clonidine in neuropathic pain.

CLONIDINE, an  $\alpha_2$ -adrenergic agonist, produces analgesia in humans and animals after intrathecal administration. Previous data suggest that clonidine is more potent in treating neuropathic pain than acute nociceptive pain in humans<sup>1</sup> and is more effective against hypersensitivity states induced by peripheral nerve injury than against

acute nociceptive stimulation in normal animals.<sup>2,3</sup> The goal of the current study was to probe one possible mechanism for this shift in potency and efficacy of intrathecal clonidine in neuropathic pain.

It has been suggested that spinal acetylcholine release has an important role in  $\alpha_2$  adrenoceptor-mediated antinociception in the spinal cord. Intrathecal clonidine increases cerebrospinal fluid concentrations of acetylcholine in humans,<sup>4</sup> and intrathecal or local administration of clonidine into the spinal cord dorsal horn increases efflux of acetylcholine in spinal cord dorsal horn extracellular fluid, as measured by microdialysis.<sup>5,6</sup> Several lines of evidence suggest that  $\alpha_2$  adrenergic-mediated antinociception after nerve injury from intrathecal clonidine relies heavily on a cholinergic interaction. For example, in hypersensitivity states induced by spinal nerve ligation (SNL) in rats, the reduction in mechanical allodynia by intrathecal clonidine is reversed by muscarinic receptor antagonists.<sup>7</sup> In SNL rats, the selective destruction of cholinergic cells in the spinal cord by the cholinotoxin monoethyl-choline mustard aziridium ion (AF64-A) reduces both the spinal cord content of acetylcholine and the antiallodynic effect from intrathecally administered clonidine.<sup>8</sup> In contrast, antinociception to short-term noxious heat and mechanical stimulation from intrathecal clonidine in normal rats is not blocked by intrathecal atropine.<sup>2</sup>

These observations suggest that the muscarinic cholinergic receptor dependency of spinal  $\alpha_2$  adrenoceptor-mediated analgesia increases progressively from acute nociception in normal animals to nerve injury-induced chronic hypersensitivity. We speculated that one mechanism for this shift might be increased acetylcholine release in the dorsal horn of the spinal cord by clonidine after nerve injury compared with normal rats. To test this hypothesis, we compared acetylcholine release from spinal cord tissue in response to clonidine application in SNL with normal rats using two different methods of neurotransmitter release *in vitro*: synaptosomes, which test direct effects on synaptic release,<sup>9,10</sup> and spinal cord slices, in which some neuronal circuits remain in place.<sup>11</sup>

## Materials and Methods

### Animal Preparation

After approval was obtained from the institutional Animal Care and Use Committee (Wake Forest University School of Medicine, Winston-Salem, North Carolina),

\* Research Fellow, Department of Anesthesiology, Gunma University Graduate School of Medicine, Maebashi, Gunma, Japan. † Assistant Professor of Anesthesiology, ‡ F.M. James, III Professor of Anesthesiology, Wake Forest University School of Medicine.

Received from the Department of Anesthesiology and Center for the Study of Pharmacologic Plasticity in the Presence of Pain, Wake Forest University School of Medicine, Winston-Salem, North Carolina. Submitted for publication July 22, 2004. Accepted for publication November 12, 2004. Supported by grant No. NS41386 from the National Institutes of Health, Bethesda, Maryland, and a grant for Japanese researchers overseas from the Ministry of Education, Culture, Sports, Science and Technology, Tokyo, Japan.

Address reprint requests to Dr. Eisenach: Department of Anesthesiology, Wake Forest University School of Medicine, Medical Center Boulevard, Winston-Salem, North Carolina 27157. Address electronic mail to: jim@eisenach.us. Individual article reprints may be purchased through the Journal Web site, www.anesthesiology.org.

male Sprague-Dawley rats weighing 200–280 g at the time of purchase (Harlan, Indianapolis, IN) were studied. Animals were housed under a 12-h light-dark cycle, with access to food and water *ad libitum*. Animals were separated into two groups: no surgery (n = 35) or SNL (n = 66). We chose no surgery as a control rather than sham surgery with exposure of nerves without ligation, because we were interested in changes within the dorsal root ganglia cells during the neuropathic state. We recognize that we therefore could not exclude an effect of inflammation or surgery itself as opposed to nerve injury.

Spinal nerve-ligated rats weighing 200–220 g were anesthetized with halothane (2–3% in oxygen), and the left L5 and L6 spinal nerves were isolated and ligated tightly with 6-0 silk sutures distal to the dorsal root ganglia as previously described.<sup>12</sup> After surgery, animals were housed individually with free access to food and water and were allowed to recover for at least 14 days. Left paw tactile allodynia was confirmed at this time by measuring the hind paw withdrawal threshold in response to application of von Frey filaments, using a previously described up-down method.<sup>13</sup> Only animals with a withdrawal threshold less than 4 g were used. All *in vitro* studies were performed 3 weeks after SNL surgery, at a time of allodynia to von Frey filament testing.

### Synaptosomes

After induction of anesthesia with 2–3% halothane, animals were killed by decapitation, and the lumbar enlargement (approximately L2–L5) of the spinal cord was quickly removed and placed in oxygenated (with 95% oxygen–5% carbon dioxide) ice-cold modified Krebs buffer containing 125 mM NaCl, 3 mM KCl, 1.2 mM MgSO<sub>4</sub>, 1.2 mM CaCl<sub>2</sub>, 1 mM KH<sub>2</sub>PO<sub>4</sub>, 22 mM NaHCO<sub>3</sub>, and 11.5 mM glucose (pH = 7.35). The left dorsal quadrant of the spinal cord ipsilateral to nerve injury was removed from SNL rats and homogenized in 8 ml ice-cold 0.32 M sucrose. To decrease the number of rats, the entire dorsal half of the spinal cord was used in normal rats. Each synaptosome preparation contained tissue of four SNL rats or two normal rats. A crude synaptosomal pellet was prepared from mechanically homogenized tissue by differential centrifugation at 2,000g followed by 20,000g as previously described.<sup>14</sup>

Acetylcholine release from synaptosomes and tissue slices was done after loading with [<sup>3</sup>H]choline according to standard methods, which results in rapid uptake of choline, acetylation to acetylcholine, and release of [<sup>3</sup>H]acetylcholine with depolarization.<sup>15,16</sup> We did not, however, confirm in the current experiments that released radioactivity was completely in the form of [<sup>3</sup>H]acetylcholine. For the synaptosome experiments, the crude pellet was resuspended into 4 ml modified Krebs buffer, loaded with [<sup>3</sup>H]choline, and incubated at 37°C for 20 min. Free [<sup>3</sup>H]choline was then removed by

centrifugation at 20,000g for 5 min. The synaptosomal pellet was again suspended into 4.5 ml modified Krebs buffer, and 150 μl of the suspension was aliquoted into each test tube with 850 μl modified Krebs buffer containing different concentrations of clonidine. Each tube also contained hemicholinium-3 at a final concentration of 10 μM to prevent reuptake of acetylcholine. For KCl stimulation, the concentration of KCl in the test tube was increased to 12 mM. Tubes were then incubated for 10 min at 37°C in a total volume of 1 ml. At the end of incubation, the amount of [<sup>3</sup>H] remaining in synaptosomes was determined by rapid filtration through GF/C glass filters presoaked for 30 min in 0.1% polyethylene to reduce nonspecific binding. This was followed by three times 4-ml washes with ice-cold buffer in which glucose was substituted for NaCl. The bound (retained) radioactivity was determined 24 h later by scintillation counting. The effects of clonidine at doses from 10<sup>-8</sup> to 10<sup>-4</sup> M on [<sup>3</sup>H]acetylcholine release were determined by the amount of tritium remaining in the synaptosomes incubated in buffer without high KCl concentration (control) compared with treatment with each concentration of clonidine with physiologic (3 mM) or depolarizing (12 mM) concentrations of KCl. Fractional release was calculated in each sample from the retained radioactivity, and percentage change in fractional acetylcholine release by clonidine defined as (control – clonidine)/control × 100. Each experiment was performed in duplicate for each concentration, and the mean value was included.

To determine whether another α<sub>2</sub>-adrenoceptor agonist would mimic the effects of clonidine, synaptosomes from normal and SNL rats (n = 7 each) were prepared, and the effect of KCl alone and in the presence of 10 nM dexmedetomidine was examined.

### Spinal Cord Slices

Rats were anesthetized with halothane and killed by decapitation, and the lumbar enlargement of the spinal cord was quickly removed. The left dorsal semihalf was chopped in 0.6-mm slices. The slices were preincubated with [<sup>3</sup>H]choline for 40 min at 37°C in oxygenated (with 95% oxygen–5% carbon dioxide) modified Krebs buffer containing 125 mM NaCl, 3 mM KCl, 1.2 mM MgSO<sub>4</sub>, 1.2 mM CaCl<sub>2</sub>, 1 mM KH<sub>2</sub>PO<sub>4</sub>, 22 mM NaHCO<sub>3</sub>, and 11.5 mM glucose (pH = 7.35). Four to five spinal cord slices were put into each chamber surrounded by a temperature-controlled water bath maintained at 33°C.

The slices were superfused continuously with a multichannel pump at 0.5 ml/min with oxygenated modified Krebs buffer containing 10 μM hemicholinium-3. After an initial perfusion of 40 min, 5-min fractions were collected. At 15 min and again at 50 min after beginning of fraction collection, the slices were depolarized for 5 min by increasing the concentration of KCl in the superfusion fluid to 25 mM. The total tritium overflow in re-

sponse to 25 mM KCl was usually between 150 and 200% of the baseline release.

The test drugs (clonidine and idazoxan) were applied beginning 40 min after the beginning of fraction collection until 55 min. This coincided to the time beginning 10 min before the second KCl depolarization to the end of this depolarization. The radioactivity of each sample was determined 24 h later by scintillation counting. The KCl-evoked [ $^3\text{H}$ ]acetylcholine release was calculated by subtracting the values of the basal release from the total release during the stimulation period. For each sample, the ratio of fractional release value during the second to the first KCl depolarization was calculated. In control slices, this ratio was  $1.01 \pm 0.05$ . The effects of clonidine concentrations from  $10^{-6}$  to  $10^{-4}$  M on KCl-evoked [ $^3\text{H}$ ]acetylcholine release were determined and compared to release in the presence of buffer only before KCl depolarization.

### Materials

[ $^3\text{H}$ ]Choline was purchased from Perkin Elmer (Boston, MA). Bio Safe II scintillation cocktail was obtained from Research Product International Corp. (Mount Prospect, IL).  $\text{MgSO}_4$ ,  $\text{KH}_2\text{PO}_4$ , and  $\text{NaHCO}_3$  were obtained from Fisher Scientific (Fair Lawn, NJ). The remaining chemicals were obtained from Sigma Chemical Co. (St. Louis, MO).

### Statistics

Experiments were replicated four to five times for synaptosomes and five times for slices. All data are expressed as mean  $\pm$  SEM. For concentration-response studies, groups were compared by one-way or two-way analysis of variance. For antagonist studies, the clonidine-treated group and other groups were compared by one-way analysis of variance. A  $P$  value less than 0.05 was considered significant.

## Results

### Synaptosomes

In normal rats,  $10^{-8}$  to  $10^{-4}$  M clonidine alone (before KCl depolarization) increased [ $^3\text{H}$ ]acetylcholine release compared with vehicle. In contrast, the highest concentration of clonidine inhibited [ $^3\text{H}$ ]acetylcholine release in SNL rats compared with vehicle in the absence of KCl depolarization (fig. 1). The effect of clonidine alone on [ $^3\text{H}$ ]acetylcholine release differed significantly in synaptosomes between normal and SNL animals.

KCl, 12 mM, provoked [ $^3\text{H}$ ]acetylcholine release by  $17 \pm 0.9\%$  in synaptosomes from normal rats and  $17 \pm 1.2\%$  in synaptosomes from SNL rats, compared with Krebs buffer control. The effect of clonidine on KCl-evoked [ $^3\text{H}$ ]acetylcholine release in synaptosomes from SNL rats was greater than that in synaptosomes in normal

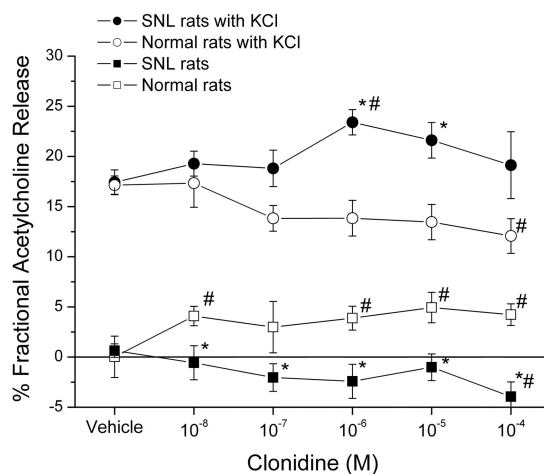

**Fig. 1.** Effect of clonidine on acetylcholine release from lumbar dorsal spinal cord synaptosomes from spinal nerve-ligated (SNL; closed symbols) or normal (open symbols) rats, with (circle) or without (square) 12 mM KCl stimulation. Each point represents the mean  $\pm$  SEM of four to five experiments. \*  $P < 0.05$  versus normal ( $P$  value for analysis of variance = 0.012). #  $P < 0.05$  versus vehicle ( $P$  value for analysis of variance = 0.008).

rats (fig. 1). In a separate analysis within normal and SNL animals, 1  $\mu\text{M}$  clonidine increased KCl-evoked acetylcholine release compared with control in synaptosomes from SNL animals, whereas 100  $\mu\text{M}$  clonidine inhibited KCl-evoked acetylcholine release compared with control in synaptosomes from normal animals (fig. 1).

Qualitatively similar results were obtained with the highly selective  $\alpha_2$ -adrenoceptor agonist dexmedetomidine. In spinal cord synaptosomes from normal animals, 10 nM dexmedetomidine inhibited KCl-evoked [ $^3\text{H}$ ]acetylcholine release, whereas in spinal cord synaptosomes from SNL animals, dexmedetomidine enhanced KCl-evoked [ $^3\text{H}$ ]acetylcholine (fig. 2;  $P < 0.005$  for each effect).

### Spinal Cord Slices

Perfusion of spinal cord slices for 5 min with 25 mM KCl provoked [ $^3\text{H}$ ]acetylcholine release at  $164 \pm 3\%$  of 3 mM KCl control. The second KCl exposure resulted in less fractional release than the first, with a ratio of  $0.65 \pm 0.019$  ( $n = 45$ ). Compared with vehicle control within each group, clonidine did not alter the response to the second KCl exposure, although there were strong trends ( $P < 0.1$  for main analysis of variance) toward enhanced release from slices from SNL animals and reduced release in slices from normal animals. Comparing the effect of clonidine between the groups demonstrated significantly greater KCl-evoked acetylcholine release in slices from SNL animals than in slices from normal animals, with a peak effect at  $10^{-5}$  M (fig. 3).

Simultaneous perfusion of  $10^{-5}$  M idazoxan with  $10^{-5}$  M clonidine in spinal cord slices from SNL animals significantly reduced KCl-evoked release. Interestingly, ida-

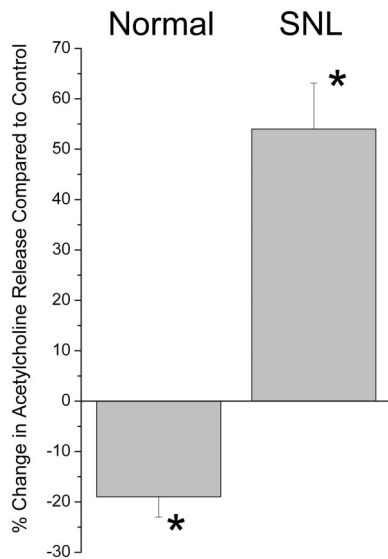

**Fig. 2.** Effect of 10 nM dexmedetomidine on acetylcholine release from lumbar dorsal spinal cord synaptosomes from normal (left) or spinal nerve-ligated (SNL; right) rats. Each bar represents the mean  $\pm$  SEM of four experiments. \*  $P < 0.005$  compared with control.

zoxan alone produced a small reduction in response to the second depolarization with KCl (fig. 4), consistent with tonic  $\alpha_2$ -adrenoceptor tone in this preparation.

## Discussion

Spinally released acetylcholine produces analgesia primarily by actions on muscarinic cholinergic receptors.<sup>17</sup> Activation of muscarinic receptors facilitates  $\gamma$ -aminobutyric acid release onto primary afferents in lamina II to inhibit the release of glutamate.<sup>18,19</sup> In addition, evoked activity of projecting neurons in deeper laminae of the spinal cord is inhibited *in vivo* by muscarinic receptors.<sup>20</sup>

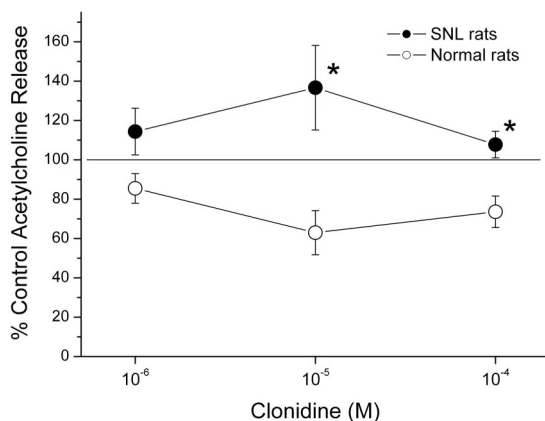

**Fig. 3.** Effect of clonidine on KCl-evoked acetylcholine release from lumbar dorsal spinal cord slices from spinal nerve-ligated (SNL; closed circles) or normal (open circles) rats. Data are expressed as percent of fractional release without drug exposure. Each point represents the mean  $\pm$  SEM of five experiments. \*  $P < 0.05$  versus normal ( $P$  value for analysis of variance = 0.011).

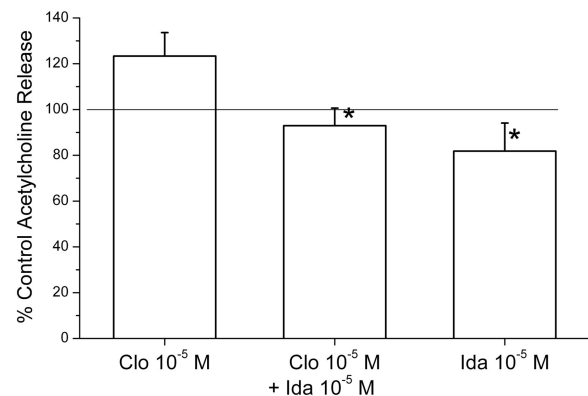

**Fig. 4.** Effect of idazoxan (Ida) on clonidine (Clo)-induced facilitation of acetylcholine release from KCl exposure in lumbar dorsal spinal cord slices from spinal nerve ligated rats. Data are expressed as percent of fractional release without drug exposure. Each point represents the mean  $\pm$  SEM of five experiments. \*  $P < 0.05$  versus clonidine-treated group ( $P$  value for analysis of variance = 0.018).

Spinal acetylcholine release is increased by analgesics, including systemically administered morphine<sup>21</sup> and intrathecally administered carbachol<sup>22</sup> and clonidine.<sup>23</sup>

The purpose of the current study was to better understand the mechanisms that underlie the increase in potency and efficacy of  $\alpha_2$ -adrenoceptor agonists for analgesia in chronic compared with acute pain states. The focus on acetylcholine follows from observations that intrathecal clonidine increases concentrations of this neurotransmitter in patients with pain<sup>4</sup> and that intrathecal clonidine-induced relief of hypersensitivity to mechanical stimuli in animals with peripheral nerve injury is blocked by intrathecal atropine, whereas atropine does not block the effect of clonidine in normal animals.<sup>2</sup> The selective reliance of clonidine on muscarinic cholinergic receptor activation in animal models of neuropathic pain could reflect increased clonidine-induced acetylcholine release. Alternatively, clonidine induced acetylcholine release could be similar in normal and SNL animals, but there may be a change in cholinergic receptor expression or location. The current study provides evidence that clonidine stimulates spinal acetylcholine release after peripheral nerve injury.

All previous studies examining acetylcholine release by  $\alpha_2$ -adrenoceptor agonists were performed *in vivo*, by either dorsal horn microdialysis or sampling of cerebrospinal fluid. The current study sought to determine whether clonidine-induced acetylcholine release reflected an action on nerve terminals themselves, which we tested using synaptosomes, or acted on local spinal circuits, which we tested using spinal cord slices. Synaptosomes are commonly used to examine regulation of neurotransmitter release in the absence of indirect effects from disinhibition or activation of excitatory neuronal inputs to the terminals.<sup>9,10,24</sup>

Clonidine alone produced a small and concentration-independent release of acetylcholine from spinal cord

synaptosomes in normal animals and none from synaptosomes from SNL animals. We did not anticipate that clonidine would induce acetylcholine release in synaptosomes, because  $\alpha_2$  adrenoceptors are classically inhibitory, coupling with G proteins, which decrease cyclic adenosine monophosphate concentrations and result in reduced voltage-gated calcium channel opening.<sup>25</sup> Because  $\alpha_2$  adrenoceptors colocalize with cholinergic neurons in the spinal cord,<sup>26</sup> we anticipated that clonidine would, if anything, reduce acetylcholine release and that clonidine-induced acetylcholine release *in vivo* reflected activation of circuits rather than direct effects on cholinergic terminals.

In contrast to the minimal effect of clonidine alone on acetylcholine release in synaptosomes, clonidine clearly augmented acetylcholine release in synaptosomes depolarized by KCl only in tissue from SNL animals. We chose KCl to nonselectively stimulate all synaptosomes to examine the influence of clonidine on evoked release. As with release from drug alone, we anticipated that clonidine would, if anything, reduce evoked acetylcholine release, not increase it, but this occurred only in tissue from normal animals. The current results, in contrast to our expectations, are consistent nonetheless with reports that  $\alpha_2$  adrenoceptors can shift from inhibitory to excitatory mechanisms in neurons after peripheral nerve injury<sup>27</sup> or inflammation,<sup>28</sup> possibly because of a shift in G-protein species, because  $\alpha_2$  adrenoceptors can couple with excitatory, Gs species when these are present in adequate numbers.<sup>29</sup>

Perfusion of spinal cord slices *in vitro* also demonstrated enhancement of evoked acetylcholine release only in tissue from SNL animals. In both synaptosome and slice studies, the effect of clonidine was reduced at higher concentrations, potentially because of actions of clonidine on  $\alpha_1$  adrenoceptors.<sup>30</sup> At a clonidine concentration producing a peak effect, however, this was completely reversed by the selective  $\alpha_2$ -adrenoceptor antagonist idazoxan. The peak effect of clonidine synaptosomal experiments was an order of magnitude less ( $10^{-6}$  M) than that in slices ( $10^{-5}$  M), possibly reflecting reduced tissue penetration in the slices.

The cause of this plasticity in evoked acetylcholine release from spinal cord after nerve injury is unknown. Previous studies suggest that clonidine inhibits stimulation-evoked neurotransmitter release *via* actions on an  $\alpha_{2A}$ -adrenoceptor subtype.<sup>31,32</sup> However, nerve injury reduces  $\alpha_{2A}$ - but not  $\alpha_{2C}$ -adrenoceptor immunolabeling in the spinal cord, and  $\alpha_{2C}$ -adrenoceptors are located in the deep dorsal horn, the normal termination of large-diameter fibers that subserve mechanical input<sup>33</sup> and the site of cholinergic cell bodies, which coexpress the  $\alpha_{2C}$  adrenoceptor.<sup>26</sup> The  $\alpha_2$ -adrenoceptor subtype activated by clonidine to reduce mechanical allodynia after nerve injury shifts from the  $\alpha_{2A}$ - to  $\alpha_{2C}$ -adrenoceptor subtype,<sup>34</sup> and it is possible that increased  $\alpha_{2C}$ -adrenoceptor

number or coupling efficiency on spinal cholinergic neurons after nerve injury is responsible for increased evoked acetylcholine release by clonidine.

In summary, clonidine enhances  $K^+$ -evoked acetylcholine release in spinal cord tissue from SNL, but not normal rats, using two different preparations to measure neurotransmitter release: synaptosomes, which only measure direct action on terminals, and spinal cord slices, in which some circuits are preserved. The facilitating effect of clonidine in slices is blocked by the  $\alpha_2$ -adrenoceptor antagonist idazoxan. These data suggest that, after nerve injury, activation of spinal  $\alpha_2$  adrenoceptors induces more acetylcholine release from cholinergic neurons when these are stimulated. This neuronal plasticity may contribute to the increased potency of clonidine for analgesia and its dependency on cholinergic neuronal activation in the neuropathic pain state.

## References

- Eisenach JC, De Kock M, Klimscha W:  $\alpha_2$ -adrenergic agonists for regional anesthesia: A clinical review of clonidine (1984-1995). *ANESTHESIOLOGY* 1996; 85:655-74
- Paqueron X, Conklin D, Eisenach JC: Plasticity in action of intrathecal clonidine to mechanical but not thermal nociception after peripheral nerve injury. *ANESTHESIOLOGY* 2003; 99:199-204
- Poree LR, Guo TZ, Kingery WS, Maze M: The analgesic potency of dexmedetomidine is enhanced after nerve injury: A possible role for peripheral  $\alpha_2$ -adrenoceptors. *Anesth Analg* 1998; 87:941-8
- De Kock M, Eisenach J, Tong C, Schmitz AL, Scholtes JL: Analgesic doses of intrathecal but not intravenous clonidine increase acetylcholine in cerebrospinal fluid in humans. *Anesth Analg* 1997; 84:800-3
- Klimscha W, Tong C, Eisenach JC: Intrathecal  $\alpha_2$ -adrenergic agonists stimulate acetylcholine and norepinephrine release from the spinal cord dorsal horn in sheep: An *in vivo* microdialysis study. *ANESTHESIOLOGY* 1997; 87:110-6
- Abelson KS, Hoglund AU: The effects of the  $\alpha_2$ -adrenergic receptor agonists clonidine and rilmenidine, and antagonists yohimbine and efaroxan, on the spinal cholinergic receptor system in the rat. *Basic Clin Pharmacol Toxicol* 2004; 94:153-60
- Pan HL, Chen SR, Eisenach JC: Intrathecal clonidine alleviates allodynia in neuropathic rats: Interaction with spinal muscarinic and nicotinic receptors. *ANESTHESIOLOGY* 1999; 90:509-14
- Paqueron X, Li XH, Bantel C, Tobin JR, Voytko ML, Eisenach JC: An obligatory role for spinal cholinergic neurons in the antiallodynic effects of clonidine after peripheral nerve injury. *ANESTHESIOLOGY* 2001; 94:1074-81
- Murayama S, Umezawa J, Terajima J, Syuto B, Kubo S: Action of Botulinum Neurotoxin on acetylcholine release from rat brain synaptosomes: Putative internalization of the toxin into synaptosomes. *J Biochem* 1987; 102:1355-64
- Shinomura T, Nakao S, Adachi T, Shingu K: Clonidine inhibits and phorbol acetate activates glutamate release from rat spinal synaptosomes. *Anesth Analg* 1999; 88:1401-5
- Vasko MR, Ono H: Adenosine analogs do not inhibit the potassium-stimulated release of substance P from rat spinal cord slices. *Naunyn-Schmiedeberg Arch Pharmacol* 1990; 342:441-6
- Kim SH, Chung JM: An experimental model for peripheral neuropathy produced by segmental spinal nerve ligation in the rat. *Pain* 1992; 50:355-63
- Chaplan SR, Bach FW, Pogrel JW, Chung JM, Yaksh TL: Quantitative assessment of tactile allodynia in the rat paw. *J Neurosci Methods* 1994; 53:55-63
- Li XH, Rose G, Dongre N, Pan HL, Tobin JR, Eisenach JC: S-nitroso-L-cysteine releases norepinephrine in rat spinal synaptosomes. *Brain Res* 2000; 872:301-7
- Jope RS: Acetylcholine turnover and compartmentation in rat brain synaptosomes. *J Neurochem* 1981; 36:1712-21
- Pittel Z, Cohen S, Fisher A, Heldman E: Differential long-term effect of AF64A on [3H]ACh synthesis and release in rat hippocampal synaptosomes. *Brain Res* 1992; 586:148-51
- Naguib M, Yaksh TL: Characterization of muscarinic receptor subtypes that mediate antinociception in the rat spinal cord. *Anesth Analg* 1997; 85:847-53
- Li DP, Chen SR, Pan YZ, Levey AI, Pan HL: Role of presynaptic muscarinic and GABA<sub>B</sub> receptors in spinal glutamate release and cholinergic analgesia in rats. *J Physiol* 2002; 543:807-18

19. Baba H, Kohno T, Okamoto M, Goldstein PA, Shimoji K, Yoshimura M: Muscarinic facilitation of GABA release in substantia gelatinosa of the rat spinal dorsal horn. *J Physiol* 1998; 508:83-93
20. Chen SR, Pan HL: Activation of muscarinic receptors inhibits spinal dorsal horn projection neurons: Role of GABA<sub>B</sub> receptors. *Neuroscience* 2004; 125: 141-8
21. Bouaziz H, Tong CY, Yoon Y, Hood DD, Eisenach JC: Intravenous opioids stimulate norepinephrine and acetylcholine release in spinal cord dorsal horn: Systematic studies in sheep and an observation in a human. *ANESTHESIOLOGY* 1996; 84:143-54
22. Høglund AU, Hamilton C, Lindblom L: Effects of microdialyzed oxotremorine, carbachol, epibatidine, and scopolamine on intraspinal release of acetylcholine in the rat. *J Pharmacol Exp Ther* 2000; 295:100-4
23. Detweiler DJ, Eisenach JC, Tong C, Jackson C: A cholinergic interaction in  $\alpha_2$  adrenoceptor-mediated antinociception in sheep. *J Pharmacol Exp Ther* 1993; 265:536-42
24. Singer EA, Spork G, Schmid R: Capsaicin does not change tissue levels of glutamic acid, its uptake, or release in the rat spinal cord. *J Neurochem* 1982; 38:1383-6
25. Limbird LE: Receptors linked to inhibition of adenylate cyclase: Additional signaling mechanisms. *FASEB J* 1988; 2:2686-95
26. Pancaro C, Ma WY, Vincler M, Dufflo F, Eisenach JC: Clonidine-induced neuronal activation in the spinal cord is altered after peripheral nerve injury. *ANESTHESIOLOGY* 2003; 98:748-53
27. Sato J, Perl ER: Adrenergic excitation of cutaneous pain receptors induced by peripheral nerve injury. *Science* 1991; 251:1608-10
28. Renaud AE, Ignatowski TA, Spengler RN:  $\alpha_2$ -adrenergic receptor inhibition of cAMP accumulation is transformed to facilitation by tumor necrosis factor- $\alpha$ . *Brain Res* 2004; 1004:212-6
29. Eason MG, Kurose H, Holt BD, Raymond JR, Liggett SB: Simultaneous coupling of alpha 2-adrenergic receptors to two G-proteins with opposing effects: Subtype-selective coupling of alpha 2C10, alpha 2C4, and alpha 2C2 adrenergic receptors to Gi and Gs. *J Biol Chem* 1992; 267:15795-801
30. Tanganelli S, Antonelli T, Simonato M, Spalluto G, Tomasini C, Bianchi C, Beani L:  $\alpha_1$ -Adrenoreceptor-mediated increase in acetylcholine release in brain slices during morphine tolerance. *J Neurochem* 1989; 53:1072-6
31. Umeda E, Satoh T, Nagashima H, Potter PE, Tarkovacs G, Vizi ES:  $\alpha_{2A}$  subtype of presynaptic  $\alpha_2$ -adrenoceptors modulates the release of [<sup>3</sup>H]-noradrenaline from rat spinal cord. *Brain Res Bulletin* 1997; 42:129-32
32. Li XH, Zhao ZH, Pan HL, Eisenach JC, Paqueron X: Norepinephrine release from spinal synaptosomes: Auto- $\alpha_2$ -adrenergic receptor modulation. *ANESTHESIOLOGY* 2000; 93:164-72
33. Stone LS, Vulchanova L, Riedl MS, Wang J, Williams FG, Wilcox GL, Elde R: Effects of peripheral nerve injury on alpha-2A and alpha-2C adrenergic receptor immunoreactivity in the rat spinal cord. *Neuroscience* 1999; 93:1399-407
34. Dufflo F, Li X, Bantel C, Pancaro C, Vincler M, Eisenach JC: Peripheral nerve injury alters the  $\alpha$ -adrenoceptor subtype activated by clonidine for analgesia. *ANESTHESIOLOGY* 2002; 97:636-41
